# Supplementary material
Source: MDPI journal article supplement (https://www.mdpi.com/2073-4395/9/10/604)
Supplement: s1 [file s1]

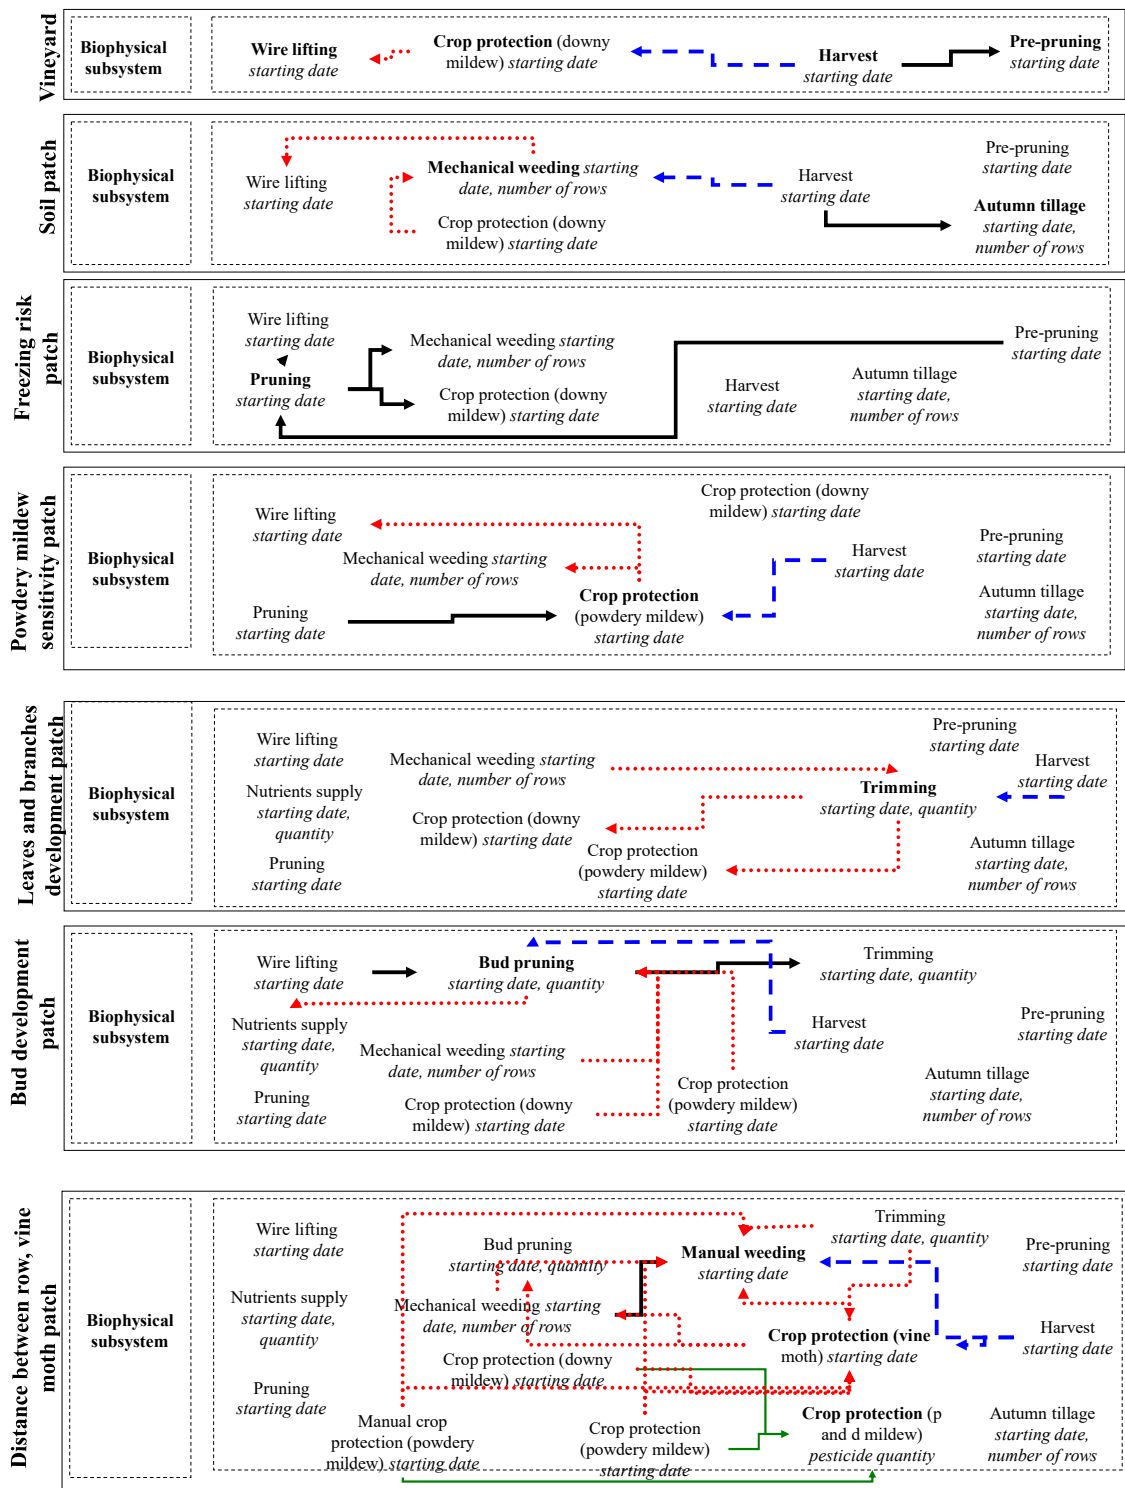

Figure 1. The whole hierarchical decomposition of the technical subsystem of the patches at the different cropping system organization levels. The interactions in each patch of all the levels are shown in the figure. Each arrow represents an interaction (which can be described by a decision rule) between two crop management operations: continuous thin arrow = start; thin dotted arrow = report; long dotted arrow = stop; continuous thick arrow = activate.
